# Supplementary material for: Untargeted metabolomics analysis of the hippocampus and cerebral cortex identified the neuroprotective mechanisms of Bushen Tiansui formula in an aβ25-35-induced rat model of Alzheimer’s disease
Source: Front Pharmacol. 2022 Oct 20;13:990307. doi: 10.3389/fphar.2022.990307 (PMC9630565; doi:10.3389/fphar.2022.990307)
Supplement: Supplementary file 6 [file Table1.XLSX]

## Sheet: Table S1
Metabolite	VIP_value	P_value	M1	M3	M4	M5	M6	M8	M9	M10	M15	S2	S4	S5	S6	S7	S8	S9	S11	S12
LysoPC(16:0)	1.0846	0.03503	6.0297	5.9599	6.0434	5.9869	5.9981	5.9499	5.7897	5.9316	5.8671	6.0116	6.0202	5.9074	6.0431	6.1299	5.9585	6.0468	6.2255	6.0592
SM(d18:1/18:1(11Z))	1.20981	0.02959	5.5359	5.5913	5.5918	5.6447	5.5495	5.6842	5.67	5.6473	5.8346	5.5531	5.4071	5.4677	5.4627	5.5902	5.6812	5.5446	5.6266	5.5249
Cer(d18:1/18:0)	1.48363	0.02479	5.8953	6.0746	6.0027	5.8873	6.074	6.0038	5.9901	5.6049	5.9048	6.0633	5.9183	6.1437	6.1591	6.2325	6.1442	5.883	6.1977	6.0867
Guanosine	1.20627	0.0005659	4.6324	4.7174	4.6144	4.6625	4.6611	4.7025	4.7377	4.6522	4.6701	4.5415	4.627	4.6303	4.576	4.5408	4.5941	4.6079	4.6246	4.6202
LysoPC(20:1(11Z))	1.26612	0.03491	4.8523	4.8008	4.9723	4.8424	4.9057	4.7475	4.7298	4.8353	4.7695	5.0671	4.9156	4.7228	4.8139	4.9751	4.8754	4.9986	5.2086	5.0015
UDP-D-galactose	1.63791	0.02411	4.8572	5.0224	4.8371	4.6932	4.787	4.7793	4.6339	5.0504	5.1479	4.6734	4.4981	4.7732	4.6195	4.566	4.6945	4.761	4.8311	4.8359
Gamma-Glutamylphenylalanine	1.34704	0.01058	4.2485	4.2366	4.2065	4.2691	4.2757	4.161	4.1655	4.1246	3.9532	4.3644	4.375	4.2954	4.2995	4.3064	4.3022	4.3344	4.2013	4.1932
LysoPE(20:1(11Z)/0:0)	1.57105	0.03698	4.0793	3.959	4.2114	4.0665	4.1334	4.0278	3.9133	4.0864	3.8267	4.3353	4.1559	3.8677	4.0723	4.1934	4.1198	4.2246	4.6507	4.3872
N-Acetyl-L-phenylalanine	1.37941	0.008671	3.4439	3.4559	3.5185	3.47	3.4889	3.3675	3.4281	3.5443	3.4961	3.7333	3.7332	3.5223	3.471	3.6117	3.5171	3.6102	3.457	3.5858
Glutathione	2.19733	0.007408	5.6536	5.9944	6.1229	5.9025	5.6263	5.8488	5.9209	6.2299	6.4413	5.5328	5.5286	5.7894	5.8385	5.7657	5.7082	5.4534	5.6678	5.7416
Acetyl-DL-Leucine	1.77108	0.002178	3.4382	3.4031	3.5193	3.4876	3.5182	3.3318	3.5194	3.3281	3.4441	3.7969	3.7987	3.5271	3.5477	3.5972	3.6	3.6375	3.4751	3.5266
Uridine diphosphate-N-acetylglucosamine	1.21824	0.03876	5.2793	5.4393	5.4556	5.2765	5.3511	5.3329	5.3268	5.4489	5.6699	5.1956	5.2351	5.4033	5.3285	5.3177	5.3207	5.24	5.1754	5.3729
N-[(4E,8E)-1,3-dihydroxyoctadeca-4,8-dien-2-yl]hexadecanamide	1.52854	0.02113	4.5874	4.8016	4.8794	4.7105	4.8475	4.8694	4.7157	4.4315	4.6653	4.832	4.8142	4.8759	5.0363	4.9522	4.8324	4.6878	4.9907	4.8752
Gamma-Glutamylglutamic acid	1.06574	0.04314	5.4768	5.5741	5.5044	5.5354	5.5239	5.56	5.5641	5.5723	5.6316	5.2218	5.4344	5.4933	5.5683	5.4747	5.5531	5.4521	5.4665	5.5374
Adenosine 2'-phosphate	1.43242	0.02592	5.4362	5.6544	5.3571	5.5017	5.362	5.4538	5.5183	5.5504	5.5429	5.5252	5.2861	5.3363	5.0804	5.416	5.4205	5.5028	5.3327	5.2429
4-Deoxythreonic acid	1.18104	0.02125	3.2973	3.2389	3.312	3.1851	3.1719	3.3046	3.2565	3.3744	3.4437	3.1501	3.2635	3.1665	3.3139	3.0923	3.1067	3.2318	3.166	3.2243
Guanosine monophosphate	1.72273	0.003075	4.8137	5.0595	4.8609	5.0452	4.8223	4.9499	4.9624	4.9269	5.0351	4.9061	4.7018	4.7398	4.6228	4.7457	4.8579	4.9308	4.7823	4.7583
Alanyl-Histidine	1.41312	0.04494	3.6404	3.7498	3.2768	3.6008	3.605	3.5416	3.5926	3.6315	3.1901	3.4682	3.638	3.6574	3.7962	3.8	3.5631	3.8042	3.6927	3.8749
3-Phenylpropionylglycine	1.66859	0.01049	3.4791	3.6511	3.7254	3.6019	3.5669	3.4387	3.4245	3.4952	3.3064	3.7996	3.8217	3.721	3.6536	3.8419	3.6096	3.6884	3.4419	3.6641
2'-Deoxyuridine	1.43624	0.01719	4.2561	4.5063	4.3332	4.3341	4.2823	4.2	4.2648	4.2516	4.1859	4.5088	4.3859	4.584	4.4849	4.2508	4.3228	4.3765	4.3353	4.5904
Stearic Acid ethyl ester	2.18852	0.001037	3.7242	3.6597	3.7821	3.7306	3.8746	3.7918	3.7149	3.6799	3.635	3.9925	3.9338	3.7159	3.9409	4.0718	3.8004	3.9366	4.241	4.2118
N-Palmitoylsphingosine	1.88817	0.00764	4.7099	4.9291	4.871	4.7286	4.9448	4.8567	4.7576	4.464	4.8417	5.0201	4.7613	5.0839	5.0767	5.2002	4.9432	4.7814	5.1708	5.0203
Adenylsuccinic acid	1.91089	0.00639	4.9955	4.975	4.5915	4.6986	4.9263	4.6745	4.7434	4.7359	4.7368	4.7593	4.5838	4.538	4.2937	4.6282	4.7411	4.6424	4.5324	4.4336
LysoPE(18:2(9Z,12Z)/0:0)	1.42789	0.01733	5.0324	4.8588	4.9625	4.953	4.9639	4.8996	4.8196	4.9754	4.7568	5.0203	5.0876	4.8543	5.0096	5.1272	4.9226	5.0467	5.3132	5.0866
Glycolic acid	1.12693	0.007114	6.1839	6.1862	6.138	6.1917	6.2282	6.1206	6.152	6.0874	6.0451	6.2287	6.2922	6.2593	6.2182	6.2466	6.2475	6.1904	6.1657	6.157
Hydroxyzileuton	2.08202	0.01474	4.9254	5.3539	5.4535	5.2444	4.9206	5.2004	5.2871	5.5958	5.7793	4.8697	4.8547	5.0838	5.2783	5.0642	5.0131	4.7876	5.014	5.1486
1-Pentadecene	1.22332	0.0298	4.7771	4.6883	4.7631	4.7735	4.8165	4.7782	4.7656	4.6345	4.6907	4.8083	4.7847	4.6875	4.8255	4.9119	4.788	4.8086	5.1269	4.9389
D-Glucurono-6,3-lactone	1.43707	0.02343	4.2134	4.219	4.1706	4.1346	4.2191	4.0667	4.0848	3.9214	3.7964	4.2378	4.3759	4.3114	4.24	4.2641	4.2369	4.1763	4.1333	4.1156
Pyrimidodiazepine	2.41606	6.746e-05	2.7665	2.7201	2.7576	2.7669	2.5836	2.8207	2.6627	2.6997	2.784	2.5336	2.4299	2.5574	2.4594	2.4418	2.5011	2.5773	2.1413	2.5269
3-ketosphinganine	1.56207	0.02651	3.6132	3.3301	3.5679	3.5547	3.5916	3.4128	3.4503	3.683	3.297	3.6288	3.6684	3.3307	3.643	3.7457	3.5967	3.7222	3.9797	3.7907
Oleic acid	1.70729	0.00513	3.311	3.23	3.3889	3.3243	3.322	3.2991	3.2986	3.198	3.2324	3.3953	3.5547	3.1563	3.4691	3.506	3.3951	3.4124	3.654	3.6288
D-Dethiobiotin	1.34615	0.03505	3.062	3.0967	3.1523	3.1451	3.2824	3.0201	2.9648	3.0227	2.8823	3.3191	3.2633	3.2486	3.329	3.213	3.125	3.1064	3.0791	3.0394
Ubiquinone-1	1.55669	0.01746	3.4497	3.2727	3.125	3.3029	3.3762	3.2962	3.3458	3.176	3.3148	3.1264	3.1444	3.0588	3.036	3.0524	3.4322	3.2279	3.2465	2.983
Cer(d18:1/14:0)	2.2994	0.004726	3.8943	4.0253	4.1662	3.9404	4.137	3.9662	3.8197	3.3975	3.7298	4.2551	4.1325	4.1324	4.3378	4.3495	4.0911	3.9079	4.3567	4.2371
3-Dimethylallyl-4-hydroxymandelic acid	1.16381	0.0005852	3.5914	3.5992	3.5777	3.5981	3.5466	3.5776	3.5813	3.6247	3.6744	3.5544	3.5453	3.5082	3.5252	3.5277	3.5912	3.5213	3.4886	3.4992
Phosphoserine	1.11421	0.003559	4.2856	4.1236	4.1522	4.1359	4.1782	4.1684	4.0454	4.1726	4.1655	4.2026	4.2442	4.2283	4.1947	4.2397	4.3045	4.2695	4.2571	4.2183
O-Phosphohomoserine	1.04385	0.03575	4.6222	4.6549	4.6186	4.5903	4.5401	4.6932	4.6194	4.7033	4.7749	4.4662	4.5172	4.5244	4.6318	4.5719	4.6484	4.6068	4.5701	4.6374
Crustecdysone	6.52503	0.0001479	2.2205	0	2.7111	2.9794	2.6533	2.2429	3.3712	2.9063	2.8115	0	0	0	0	0	0	0	0	2.5808
Pregnanetriol	2.26834	0.03354	3.3193	3.4363	3.2936	3.2978	3.6609	2.8275	3.0525	2.3688	2.4791	3.5236	3.6206	3.7212	3.6106	3.5016	3.2209	3.4362	3.1441	3.31
S-Japonin	1.96375	0.004478	3.9552	3.7697	3.9508	3.9556	4.0639	3.9952	3.8962	3.7789	3.8968	4.0568	4.1408	3.8139	4.1696	4.2196	4.0529	4.1067	4.4981	4.2656
Dinitolmide	1.30089	0.03614	3.518	3.7042	3.7565	3.7772	3.8249	3.6529	3.5496	3.5392	3.3896	3.7634	3.8591	3.7546	3.8049	3.7572	3.6615	3.8095	3.6487	3.7463
Cystathionine ketimine	3.74376	0.02488	2.6851	2.6762	2.9473	2.7376	3.1513	1.7804	1.7308	0	0	3.2256	3.1657	2.9693	2.947	2.8006	2.6453	3.327	2.7332	3.0781
12-oxo-10,11-dihydro-20-COOH-LTB4	1.18072	0.0256	3.6207	3.5719	3.7147	3.5016	3.5945	3.5814	3.5008	3.4901	3.5133	3.6731	3.6585	3.5376	3.586	3.7636	3.5847	3.6003	3.8057	3.783
1,4-beta-D-Glucan	2.26301	0.001708	3.9751	4.1538	3.8569	4.0557	3.8966	3.9898	3.8984	4.0859	4.0388	3.6917	3.8161	3.8432	3.8015	3.7593	3.9298	3.7962	3.578	3.2727
Pentadecanoylglycine	1.4581	0.04812	3.79	4.0491	4.1127	3.8725	4.0667	4.095	3.8965	3.5414	3.825	4.0744	4.0116	4.1629	4.2917	4.0694	4.0621	3.8409	4.1144	4.046
Ethyl 3-mercaptobutyrate	1.41992	0.001675	5.0084	5.051	4.9847	5.0697	5.0079	5.084	5.0624	5.0578	5.1613	4.8245	4.8921	4.9939	4.995	4.9861	5.0476	4.9129	4.9436	4.9344
Uridine 5'-monophosphate	1.59181	0.0108	3.9415	4.0656	4.0718	3.9332	3.871	4.0383	4.1365	3.9541	4.1551	3.968	3.8326	3.9119	3.7037	3.9091	3.9242	4.0475	3.6528	3.8456
Paracetamol sulfate	1.7921	0.00211	3.2036	3.1366	3.0944	3.2656	3.2073	2.9941	3.0828	3.0482	3.0267	3.341	3.3431	3.4007	3.3351	3.4412	3.2102	3.2354	3.1462	3.154
FMLP	1.09521	0.004294	4.4303	4.3415	4.4156	4.4409	4.3957	4.4383	4.4066	4.326	4.3401	4.4645	4.456	4.3886	4.4694	4.452	4.4169	4.472	4.5383	4.5178
N-Acetyl-b-D-glucosamine	2.28861	0.007897	2.5075	2.6786	2.4421	2.3532	2.22	2.3063	2.4898	2.6163	2.7037	2.014	2.106	2.0819	2.0577	1.9801	2.0177	2.6405	2.336	2.4623
Phosphoribosyl-AMP	1.88079	0.01446	4.5722	4.5573	4.3721	4.2972	4.1469	4.5015	4.5544	4.7121	4.8052	4.2853	4.1171	4.112	4.267	4.3007	4.4244	4.3221	4.2915	4.4629
Armillane	2.14873	0.03167	2.8411	3.6512	2.9595	3.3719	3.2007	3.5372	3.5337	3.5859	4.0806	3.5705	3.185	3.2891	2.6854	3.0515	3.0019	2.5934	2.7278	3.1727
DL-Dopa	1.94341	0.04154	2.8022	3.3016	2.3426	2.5852	2.3434	2.5856	2.7699	2.6549	2.6511	2.6093	2.2395	2.2127	2.9562	2.4291	1.8989	2.1802	2.2328	2.5018
3-Methylsulfinylpropyl isothiocyanate	5.36462	0.003199	2.6744	2.3085	2.2734	2.5194	3.4003	0	0	0	0	3.557	3.5729	3.0578	3.1546	3.079	2.9881	3.6196	2.3023	3.2573
S-(Indolylmethylthiohydroximoyl)-L-cysteine	2.10093	0.003678	3.3108	3.244	3.4812	3.3767	3.2243	3.0269	3.2339	3.1866	2.9962	3.603	3.7438	3.5228	3.4006	3.5449	3.291	3.489	3.2557	3.4344
DG(15:0/16:1(9Z)/0:0)	1.48504	0.02052	3.7593	3.5489	3.6588	3.6842	3.7559	3.7465	3.6521	3.5037	3.5376	3.7418	3.7602	3.6247	3.7713	3.9044	3.6996	3.7084	4.1102	3.8805
L-Methionine	1.42031	0.02334	5.9302	6.001	6.0577	6.1343	6.0559	5.9331	5.8882	5.9877	5.8196	6.1704	6.2552	6.1664	6.1271	6.0975	6.017	6.0293	5.953	6.0177
(R)-(+)-2-Pyrrolidone-5-carboxylic acid	1.24892	0.001066	6.7499	6.8013	6.7927	6.7679	6.7676	6.816	6.7547	6.8416	6.8337	6.667	6.6805	6.7594	6.7624	6.7061	6.7514	6.7363	6.6937	6.7616
Palmatine	6.59444	0.003115	4.1028	3.8697	4.2095	4.2587	3.9918	4.0327	4.4448	4.0992	4.1587	0	0	2.6063	3.4438	2.6999	0	3.5386	3.4685	3.8262
L-Cysteine	1.67615	0.02438	4.6114	4.6759	4.6369	4.6583	4.5499	4.7852	4.8175	4.8937	4.7784	4.4002	4.4545	4.6913	4.6654	4.5843	4.8595	4.3575	4.5033	4.368
LysoPC(18:1(9Z))	1.23498	0.04149	6.163	6.027	6.2944	6.2169	6.2213	6.1551	6.0093	6.1854	6.105	6.2968	6.1969	6.0711	6.2913	6.3526	6.158	6.2668	6.4285	6.2505
Sphingosine	1.75806	0.007715	5.0332	5.0423	5.0983	5.0992	5.0703	5.1166	5.1303	5.0161	5.0333	5.1756	5.1086	5.0556	5.1661	5.4027	5.1263	5.1897	5.5086	5.3773
Palmitoyl Ethanolamide	1.676	0.02554	5.1973	4.9441	5.2015	5.226	5.1948	5.053	5.0482	5.2358	4.8936	5.3351	5.2512	4.9612	5.2624	5.3374	5.1217	5.3287	5.5573	5.4217
PC(16:0/16:0)	1.23112	0.003028	7.1031	7.077	7.1064	7.0992	7.1264	7.1152	7.1001	7.0626	7.1126	7.1497	7.1041	7.1268	7.161	7.2493	7.1462	7.1299	7.2759	7.2237
L-Arginine	1.58277	0.004003	5.6748	5.6763	5.7167	5.8363	5.7448	5.6907	5.6503	5.7231	5.5484	5.8511	5.9452	5.8119	5.8885	5.7955	5.7047	5.7795	5.746	5.809
PC(18:1(11Z)/16:0)	1.09693	0.01579	7.3314	7.2548	7.3229	7.2571	7.3432	7.2898	7.2567	7.244	7.3136	7.3372	7.3013	7.2859	7.3315	7.416	7.3475	7.3138	7.4931	7.4169
PC(14:0/16:0)	1.43667	0.013	5.7762	5.7601	5.7953	5.7477	5.8587	5.7996	5.7244	5.7179	5.6861	5.7885	5.8492	5.8502	5.8736	5.9946	5.811	5.7038	6.0628	5.9613
Tyrosyl-Hydroxyproline	1.4053	0.03249	4.7357	4.7311	4.7367	4.7909	4.821	4.6755	4.6162	4.6324	4.4664	4.95	4.9439	4.8409	4.8122	4.8168	4.7525	4.8323	4.6276	4.6898
PC(14:0/20:2(11Z,14Z))	1.50363	0.003744	6.0746	6.1346	6.1007	6.1768	6.2016	6.1167	6.12	6.1422	6.0935	6.074	6.2594	6.1566	6.2407	6.3156	6.2127	6.2293	6.3857	6.2961
Taurine	1.43268	0.01671	4.972	5.0441	5.0174	4.9259	4.8779	5.0651	4.8775	5.0466	5.0437	4.7859	4.7111	4.8265	4.9544	4.8725	4.8217	4.9862	4.952	4.9779
2-Hydroxycinnamic acid	1.42561	0.01499	6.0836	6.1524	6.1844	6.304	6.2134	6.1133	6.1009	6.1692	6.0496	6.3503	6.3943	6.3052	6.2753	6.3018	6.222	6.2167	6.1	6.1783
Guanine	1.09266	0.007265	4.5797	4.6981	4.6564	4.6437	4.607	4.7174	4.7263	4.6777	4.685	4.5763	4.6282	4.6791	4.5746	4.5467	4.6073	4.5977	4.6014	4.6101
5-Methoxynoracronycine	5.8097	1.073e-05	4.2466	4.0899	4.3297	4.3336	4.2202	4.2214	4.6043	4.2941	4.3107	2.4377	2.3916	3.3854	3.2083	3.1806	2.472	3.1718	3.4893	4.0515
PC(14:0/18:1(11Z))	1.09842	0.02241	6.2564	6.3272	6.4077	6.3361	6.3781	6.363	6.2849	6.2474	6.2875	6.35	6.3626	6.4024	6.3932	6.3782	6.3254	6.3373	6.5286	6.4554
Pantetheine 4'-phosphate	1.38363	0.04071	4.3754	4.449	4.3753	4.3935	4.3668	4.474	4.6722	4.6611	4.6274	4.295	4.4586	4.3718	4.3635	4.4197	4.5035	4.1087	4.4046	4.3134
Gamma-Glutamylleucine	1.50493	0.02265	4.9149	4.8696	4.8904	4.9656	4.9861	4.8354	4.9175	4.7814	4.6651	5.128	5.1691	5.0319	5.0258	4.9476	4.9795	4.9936	4.8144	4.8695
Sterebin G	1.93505	0.0332	5.1224	5.1381	5.1281	5.0095	5.2592	4.7648	4.7716	4.5268	4.7163	5.3175	5.2597	5.3854	5.2388	5.1569	5.0292	5.1346	4.8993	5.0572
Prolyl-Arginine	2.53979	0.009416	3.5013	3.4201	3.6981	3.8905	3.7026	3.6001	3.53	4.121	3.3926	3.9703	4.1856	3.6673	4.1481	3.8227	3.5724	4.1037	4.1251	4.3622
Gamma-Glutamyltyrosine	1.33193	0.03898	4.2663	4.2684	4.2546	4.4039	4.3731	4.165	4.2086	4.2152	4.0229	4.4926	4.4462	4.3439	4.3449	4.3802	4.3732	4.3674	4.1772	4.2444
Isoleucylproline	1.98185	0.007969	3.8137	3.8806	4.0994	4.2098	3.9691	3.9559	3.9014	4.1709	3.8248	4.3261	4.3556	4.0049	4.2052	4.0977	3.971	4.215	4.1778	4.2845
1,11-Undecanedicarboxylic acid	2.27493	0.006652	3.3262	3.144	3.2271	3.3431	3.1286	2.8954	3.3421	3.4585	2.8981	3.0563	2.9791	2.8831	2.7505	2.9548	2.7219	3.0668	2.9136	3.1497
Stearoylcarnitine	1.59446	0.04934	4.3947	4.3853	4.681	4.4934	4.5072	4.4472	4.4716	4.5473	4.4961	4.7295	4.4568	4.4722	4.422	4.7746	4.5092	4.6882	5.1521	4.8213
2-Methylbutyroylcarnitine	1.76259	0.01155	4.3146	4.2569	4.4318	4.2384	4.2143	4.1566	4.0105	4.2693	4.2742	4.1595	4.2324	4.2149	3.9699	3.9685	3.878	4.0935	4.1905	3.9717
Acetylcarnitine	1.46538	0.04488	5.4609	5.5785	5.7085	5.7181	5.4258	5.6843	5.745	5.7255	5.8862	5.5553	5.6069	5.6944	5.2515	5.5319	5.4682	5.5493	5.6073	5.3764
PHENACYLAMINE	1.42169	0.01484	5.3296	5.4013	5.441	5.5504	5.4567	5.3507	5.3495	5.4096	5.3014	5.5947	5.6421	5.5452	5.5138	5.5473	5.4731	5.4694	5.3455	5.426
Gamma Glutamylglutamic acid	1.29622	0.02287	6.0561	6.1582	6.1359	6.14	6.0963	6.1231	6.0984	6.1751	6.1904	5.7968	5.9767	6.1073	6.1486	6.0393	6.1115	6.0023	6.0488	6.0876
Daidzein 7,4'-di-O-glucoside	1.15826	0.01822	4.1661	4.2594	4.0367	4.155	4.1885	4.2678	4.1264	4.2092	4.276	4.0954	4.1069	4.0445	4.1549	4.0952	4.09	4.1639	4.1121	4.1442
(S)C(S)S-S-Methylcysteine sulfoxide	1.49502	0.00197	5.8014	5.8156	5.7565	5.9267	5.7547	5.8368	5.883	5.8746	5.8674	5.6549	5.7373	5.7891	5.7795	5.6866	5.8308	5.7046	5.7414	5.666
Sanshodiol	7.44483	0.0005512	3.9345	4.0443	4.1065	4.8862	4.1097	4.1121	4.3981	4.5409	4.1748	0	0	2.896	2.5797	0	3.6747	2.3821	2.6299	3.7013
Indoleacrylic acid	1.19054	0.04662	6.1519	6.1832	6.197	6.3017	6.2207	6.1684	6.1437	6.2009	6.0399	6.3456	6.4395	6.3037	6.2748	6.3314	6.2089	6.2044	6.1121	6.1783
Suberic acid	2.79773	0.0115	3.5109	3.2448	3.1307	3.206	3.6706	3.1815	3.1831	2.9537	2.947	4.1652	3.9883	3.8025	3.5934	3.6525	3.4667	3.6557	3.3661	2.962
3-Methyl-3-buten-1-ol	1.27557	0.001327	5.3281	5.2924	5.3861	5.3207	5.2983	5.3213	5.2464	5.3019	5.2793	5.4326	5.3513	5.316	5.3719	5.4206	5.3473	5.3867	5.4406	5.372
Methyl isobutyrate	1.16387	0.0001575	4.8283	4.8522	4.8083	4.8149	4.7965	4.8598	4.8278	4.8545	4.8586	4.7562	4.7569	4.7796	4.8009	4.7504	4.7722	4.8127	4.7869	4.8022
Monoethyl malonic acid	1.2564	0.04581	3.7111	3.6701	3.6991	3.6927	3.8652	3.5744	3.6884	3.5969	3.6814	3.9669	3.7584	3.7174	3.7159	3.8332	3.6976	3.9766	3.6289	3.8297
Avenanthramide L	2.49123	0.01088	3.7128	3.8317	3.774	3.9414	3.7448	4.1037	4.1569	4.044	4.1255	3.0509	3.5592	4.072	3.6742	3.6581	3.8729	3.3567	3.7409	3.466
Diacetone alcohol	2.20058	0.02979	5.3844	5.2781	5.1452	5.1256	5.6074	5.0139	4.8609	4.8564	4.7039	5.7189	5.72	5.4182	5.2481	5.3437	5.3061	5.5462	5.1997	5.0772
2'-Deoxyguanosine 5'-monophosphate	1.52648	0.01654	5.0303	5.2129	5.005	5.1132	4.9861	5.078	5.1331	5.1557	5.1207	5.1302	4.9444	5.0164	4.6911	4.9596	5.0004	5.0807	4.9633	4.8604
Xanthine	1.22379	0.005795	6.1734	6.1599	6.1577	6.197	6.2187	6.1441	6.1643	6.1204	6.0699	6.2368	6.3026	6.2853	6.2504	6.2212	6.2561	6.1854	6.1494	6.1665
Citraconic acid	1.70963	0.001216	6.4176	6.4942	6.4022	6.4377	6.3712	6.4755	6.3954	6.4726	6.5245	6.1467	6.2249	6.3519	6.3946	6.3199	6.3991	6.3119	6.3397	6.3627
(E)-4-Hexen-1-ol	1.00834	0.0002463	4.835	4.8472	4.8134	4.8198	4.8106	4.854	4.8325	4.8553	4.8471	4.7737	4.7809	4.797	4.8212	4.7599	4.7917	4.8142	4.7952	4.8104
3-Sulfinoalanine	2.76231	0.001049	4.0989	4.1596	4.029	4.2941	4.02	4.2774	4.3649	4.4996	4.4725	3.8226	3.7899	4.1148	3.9224	3.8644	4.2589	3.8597	3.8874	3.6583
1-Octene	1.05976	0.024	4.5297	4.6012	4.5142	4.4795	4.5616	4.6477	4.5411	4.4999	4.5136	4.6149	4.5672	4.6582	4.6888	4.5251	4.605	4.6377	4.5348	4.6287
Austdiol	1.04181	0.006947	5.1571	5.1555	5.1329	5.0746	5.0855	5.1519	5.1266	5.1482	5.1346	5.0328	5.0287	5.0433	5.1594	5.0873	5.0658	5.1203	5.0597	5.0833
Methyl 3-methylbutanoate	1.07152	0.0002948	4.5129	4.5265	4.492	4.4801	4.4687	4.519	4.4991	4.5345	4.514	4.4346	4.4358	4.4633	4.4798	4.4471	4.4422	4.4962	4.4713	4.4577
L-Glutamic acid	1.88297	0.0006839	4.8522	4.849	4.7684	4.9542	4.8412	4.9448	4.8735	4.9288	4.9922	4.5735	4.6818	4.7734	4.7785	4.7473	4.8222	4.6976	4.8289	4.7632
Phosphoric acid	1.08652	0.01881	4.892	4.9148	4.8196	4.8584	4.8135	4.9383	4.8265	4.9631	4.9676	4.7821	4.8	4.8052	4.8335	4.7595	4.8046	4.8671	4.8901	4.8629
Ethyladipic acid	1.01838	0.001727	4.9454	4.9474	4.9336	4.9229	4.9051	4.9775	4.9411	4.9657	4.9668	4.8749	4.8618	4.8865	4.9203	4.8747	4.8873	4.9442	4.9131	4.9303
6-Methyltetrahydropterin	1.33531	0.006567	3.2388	3.2311	3.1473	3.2005	3.2346	3.271	3.2116	3.1565	3.265	3.2177	3.0693	3.0828	3.1553	3.0861	3.0235	3.2065	3.0943	3.2223
Phosphocreatine	1.41411	0.02149	4.1163	4.0282	4.1359	4.1516	4.201	4.0297	3.9784	4.0551	3.9549	4.3287	4.3272	4.2426	4.174	4.1688	4.1575	4.0806	4.0215	4.1582
Hydroxyhydroquinone	1.03342	0.03753	3.3403	3.4074	3.4557	3.4143	3.4	3.3719	3.4948	3.3538	3.4433	3.5441	3.4751	3.5538	3.4809	3.4751	3.4579	3.5236	3.3531	3.3875
1,2,3-Trihydroxybenzene	1.26701	0.01408	3.3781	3.3821	3.4695	3.4379	3.4654	3.5095	3.4074	3.4622	3.5068	3.6197	3.5917	3.6016	3.4893	3.5332	3.5328	3.5798	3.4095	3.4188
1,2-Benzoquinone	1.30367	0.03576	3.0645	3.0067	3.179	3.1325	3.1324	3.187	3.0175	3.0708	3.1505	3.1799	3.3299	3.1979	3.3312	3.1165	3.2366	3.3682	3.0817	3.0341
5-(2-Methylpropyl)tetrahydro-2-oxo-3-furancarboxylic acid	2.30339	0.00565	3.1635	3.273	3.398	3.347	3.2502	3.1993	3.1949	3.2696	2.7599	3.6651	3.6764	3.506	3.4562	3.4963	3.1917	3.5047	3.2916	3.3856
Vanillin acetate	1.00436	0.02802	3.2562	3.3857	3.3435	3.2473	3.2872	3.3193	3.2981	3.3199	3.332	3.1996	3.193	3.1825	3.3184	3.2969	3.2112	3.2429	3.3452	3.2672
L-Xylonate	1.37299	0.003531	3.4921	3.547	3.4042	3.5032	3.4625	3.5306	3.4442	3.4924	3.4191	3.3351	3.2665	3.4719	3.4197	3.4369	3.3958	3.4061	3.3954	3.3793
Betaine	1.14578	0.0002533	6.9113	6.9472	6.9054	6.9078	6.8947	6.9462	6.9215	6.9457	6.9463	6.8519	6.8601	6.8914	6.9095	6.8271	6.8782	6.9031	6.8478	6.8724
Salsoline-1-carboxylate	2.11523	0.005115	4.0257	4.074	4.3182	4.1692	4.1785	3.968	3.963	4.0771	3.9053	4.4735	4.4951	4.329	4.2029	4.4026	4.1365	4.2732	4.0348	4.278
Methyl-delta-ionone	1.20918	0.008958	3.2913	3.2788	3.2776	3.2489	3.1883	3.3106	3.3884	3.3043	3.2993	3.1917	3.1769	3.1536	3.2722	3.2314	3.2083	3.2342	3.1271	3.3031
Undecanedioic acid	1.52876	0.003062	3.1573	3.103	3.1799	3.0313	3.0799	3.1121	3.1672	3.1977	3.0433	2.9446	3.0358	2.9232	3.1135	3.0841	2.9856	3.0841	2.9884	2.927
Levoglucosan	1.02356	0.01506	4.0345	4.0563	3.9691	4.0125	3.9511	4.0242	3.9483	4.0076	4.0494	3.8802	3.8998	3.9549	3.9429	3.9369	3.9828	4.0359	3.9627	3.9598
1,3,5-Trihydroxybenzene	1.24549	0.04491	3.094	3.1986	3.1135	3.1723	3.1176	3.1192	3.2328	3.0928	3.1586	3.3792	3.394	3.2349	3.1551	3.2569	3.2892	3.2787	3.0591	3.0853
Dillapional	1.24975	0.02873	3.3419	3.4621	3.36	3.3794	3.2309	3.223	3.4437	3.4582	3.4956	3.2294	3.2452	3.3292	3.2037	3.3281	3.3297	3.3141	3.2059	3.3657
Deoxyadenosine	1.25182	0.001089	3.6462	3.6742	3.7295	3.621	3.6645	3.6878	3.6544	3.6569	3.7158	3.5304	3.6236	3.6038	3.6379	3.6249	3.5602	3.5879	3.6158	3.6511
2-Ethylpyrazine	1.71071	0.02766	3.5821	3.6941	3.789	3.8529	3.5977	4.0459	3.9353	3.6584	3.888	3.7319	3.678	3.5744	3.4976	3.6691	3.8789	3.5868	3.3883	3.3752
2-Propylmalate	1.26962	0.0007062	4.001	4.0181	3.9769	3.9927	3.9805	4.0734	4.0316	4.0625	3.9477	3.9283	3.9182	3.9057	3.9871	3.9267	3.9541	3.9505	3.9739	3.9189
6-Pentyl-2H-pyran-2-one	1.54615	0.001287	3.5693	3.5672	3.5089	3.4646	3.492	3.4868	3.5719	3.4328	3.5156	3.5502	3.6271	3.6478	3.7132	3.6514	3.671	3.5693	3.5813	3.5249
2-Ketobutyric acid	1.12676	0.004834	3.2517	3.2416	3.2137	3.2268	3.2291	3.2537	3.2847	3.22	3.2714	3.0849	3.1983	3.1897	3.2209	3.1227	3.2201	3.2458	3.1585	3.1968
3-Methoxybenzenepropanoic acid	1.19694	0.003484	3.4573	3.4993	3.4674	3.5272	3.4076	3.4235	3.4416	3.3949	3.4754	3.4057	3.3391	3.388	3.3747	3.4209	3.3232	3.3758	3.4189	3.4463
Monoisobutyl phthalic acid	1.04888	0.01474	4.6672	4.6887	4.5933	4.595	4.5802	4.6262	4.6718	4.6213	4.6397	4.5068	4.5243	4.5896	4.5875	4.5893	4.5951	4.6798	4.5217	4.5527
5-Aminolevulinic acid	2.45391	0.0002982	4.1127	4.1334	4.279	4.3314	4.3246	4.1962	4.1575	4.2077	3.958	4.5273	4.6014	4.439	4.5224	4.372	4.2597	4.3602	4.3488	4.4663
Acetaldehyde hexyl isoamyl acetal	1.23825	0.006516	3.3652	3.3851	3.3593	3.4016	3.3874	3.4384	3.3112	3.4784	3.432	3.3366	3.3605	3.2975	3.3329	3.2992	3.4235	3.2656	3.2249	3.312
2-tert-Butyl-1,4-benzenediol	1.0325	0.029	3.5581	3.6927	3.5312	3.5048	3.4916	3.552	3.5267	3.6135	3.5315	3.6399	3.5663	3.6598	3.6917	3.5963	3.6547	3.5983	3.5705	3.5777
Pentyl 2-furyl ketone	1.28662	0.00398	3.3916	3.3857	3.4137	3.3863	3.3408	3.4305	3.4189	3.4287	3.3508	3.4913	3.5213	3.3578	3.5393	3.4324	3.4307	3.5545	3.4485	3.4789
1,1-Dimethoxy-2-phenylethane	1.53362	0.001255	3.1923	3.2515	3.2465	3.1879	3.1558	3.1326	3.1876	3.2762	3.2133	3.315	3.335	3.2745	3.4457	3.2745	3.28	3.3391	3.276	3.2239
Acetic acid	1.27493	0.0009938	3.4505	3.4569	3.4675	3.4742	3.4604	3.5677	3.52	3.4889	3.5621	3.3924	3.3931	3.4125	3.4537	3.404	3.4162	3.4496	3.4222	3.468
Ornithine	1.46619	0.01811	3.2937	3.4282	3.4267	3.2639	3.3051	3.2806	3.2923	3.2089	3.2823	3.6765	3.447	3.4124	3.4261	3.2962	3.4248	3.399	3.3082	3.4243
Alpha-Teresantalic acid	1.32644	0.001072	3.5849	3.6234	3.5742	3.4828	3.4773	3.5218	3.5611	3.5335	3.5265	3.5811	3.5954	3.6414	3.6455	3.594	3.6248	3.6813	3.612	3.5978
3-methyl-2-oxo-butanoic acid	1.00161	0.002385	3.5292	3.4705	3.5005	3.4932	3.4493	3.4816	3.5006	3.4672	3.4805	3.5097	3.5154	3.5808	3.5461	3.5521	3.4882	3.5511	3.4965	3.5517
(+/-)-2,4,8-Trimethyl-7-nonen-2-ol	1.05039	0.0001788	4.4625	4.4581	4.4332	4.4494	4.4378	4.474	4.4604	4.4582	4.4611	4.3501	4.4116	4.4338	4.4154	4.4192	4.4176	4.4198	4.4107	4.4226
2-Furanmethanol	1.52847	0.006291	2.8166	2.6926	2.9021	2.8961	2.8539	2.8661	2.8402	2.8848	2.9536	3.044	3.05	2.9803	3.003	3.0324	2.9832	2.9619	2.8263	2.8509
L-beta-aspartyl-L-leucine	1.41469	0.004114	3.7663	3.7782	3.7823	3.7811	3.8043	3.7623	3.812	3.741	3.6224	3.9382	3.8348	3.9059	3.9539	3.7823	3.8118	3.8397	3.7868	3.8445
3-oxo-dodecanoic acid	1.13886	0.0001442	4.1789	4.2189	4.1687	4.1694	4.1494	4.2076	4.1996	4.1994	4.1731	4.1358	4.1007	4.1484	4.132	4.0965	4.1424	4.1595	4.1317	4.1529
Blennin A	2.15688	0.0006639	3.4695	3.5404	3.4811	3.191	3.4675	3.4511	3.3168	3.2481	3.4118	3.5403	3.6492	3.6515	3.6911	3.5674	3.5789	3.652	3.5256	3.474
2-Hydroxypyridine	1.35994	0.001398	3.3471	3.3872	3.3078	3.4035	3.3114	3.4369	3.3942	3.4373	3.4368	3.2232	3.323	3.2846	3.3416	3.3016	3.3222	3.3499	3.2821	3.2898
Pyroglutamic acid	1.18619	0.01977	4.434	4.4378	4.4479	4.6058	4.5128	4.5921	4.523	4.6133	4.6218	4.4033	4.4674	4.5422	4.4727	4.4259	4.5147	4.4129	4.4092	4.4107
N-Acetylneuraminic acid 9-phosphate	2.69078	0.0003858	4.2115	4.2098	4.132	4.105	4.1719	4.2097	4.1414	4.1328	4.2687	3.4689	3.8601	4.0218	3.8204	3.9504	3.9072	4.0262	3.772	4.1163
2-Hydroxyphenylacetic acid	1.11159	0.005229	3.9244	3.881	3.8914	3.8218	3.8442	3.8917	3.8	3.829	3.8092	3.9542	3.8938	3.9653	3.9112	3.9064	3.891	3.9601	3.8804	3.8746
Alpha-[3-(Nitrosoamino)propyl]-3-pyridinemethanol	1.12958	0.000955	4.1653	4.2022	4.1617	4.1696	4.1732	4.2139	4.2089	4.1819	4.2152	4.1229	4.141	4.0919	4.1784	4.0869	4.135	4.1812	4.0968	4.1528
Norepinephrine sulfate	1.62303	0.008031	3.7712	3.7688	3.7508	3.9069	3.8851	3.7796	3.8552	3.9299	3.6056	4.048	4.0129	3.9331	4.0397	3.8806	3.8345	3.9687	3.817	3.9148
2-Methyl-2-phenyl-undecane	1.15687	0.005382	3.5391	3.5667	3.5234	3.4983	3.4157	3.4649	3.5404	3.5441	3.4891	3.3949	3.4304	3.468	3.4867	3.3947	3.4383	3.4761	3.4939	3.4029
10-Oxogeranial	1.35405	0.0002513	4.0875	4.0803	4.0503	4.039	4.0202	4.0339	3.9766	4.0719	3.9707	4.1078	4.1175	4.1263	4.1461	4.092	4.0913	4.1406	4.102	4.0795
5Z-Tetradecenoic acid	1.10661	0.04608	3.4366	3.4361	3.4485	3.4006	3.3842	3.6032	3.3994	3.4142	3.5209	3.2813	3.23	3.348	3.4682	3.4043	3.3408	3.4491	3.4118	3.423
Alpha-Carboxy-delta-decalactone	1.11974	0.004922	3.9186	4.0014	3.9617	3.9724	3.9289	3.9802	3.9886	3.9629	3.9582	3.8996	3.826	3.9179	3.9844	3.8692	3.8909	3.9703	3.8713	3.8923
Acetaldehyde diisoamyl acetal	1.02935	0.01162	3.7576	3.7686	3.7371	3.7192	3.6726	3.7675	3.6809	3.7465	3.7158	3.6252	3.6506	3.7747	3.707	3.612	3.6697	3.689	3.6672	3.6605
Ethyl propionate	1.31447	3.109e-05	3.4372	3.4972	3.4605	3.454	3.4193	3.4603	3.4665	3.4722	3.4634	3.3526	3.3923	3.3968	3.4008	3.3771	3.4467	3.4134	3.3751	3.3862
Caproic acid	1.16097	0.0003049	3.9242	3.9259	3.895	3.8965	3.8747	3.9572	3.9233	3.926	3.9032	3.8422	3.8498	3.8625	3.8785	3.7991	3.876	3.8929	3.856	3.8691
Adenosine 3',5'-diphosphate	3.03189	0.0001543	4.23	4.3439	4.2363	4.1892	4.1654	4.308	4.3119	4.2098	4.2784	3.5332	3.8671	4.0846	3.5414	3.9454	4.0068	4.0135	3.9652	4.0701
5-Hydroxyhexanoic acid	1.0188	0.02997	2.8586	2.8814	2.7036	2.7458	2.818	2.8554	2.8406	2.7759	2.8805	2.9412	2.9345	2.8466	2.8802	2.8612	2.825	2.8454	2.8907	2.8661
2,4,6-Trimethylphenol	1.3033	0.04778	2.6516	2.8017	2.6726	2.6761	2.4073	2.6514	2.7041	2.7303	2.4418	2.7403	2.7003	2.7852	2.8624	2.7399	2.5781	2.8195	2.7355	2.7545
Saccharin sodium anhydrous	1.36862	0.03905	2.8534	3.0645	2.8752	2.7421	2.8586	2.9584	2.9506	3.0651	3.031	3.0739	3.0498	3.0961	3.2325	2.9587	2.9548	3.1044	2.8892	3.0483
2-Phenyl-1,3-dioxolane-4-methanol	1.95544	0.001454	3.0246	3.1694	2.9298	3.029	2.7412	3.0916	2.9278	2.9154	3.0148	3.189	3.1046	3.2353	3.145	3.119	3.1504	3.1319	3.1545	3.1061
3-Hydroxytrichothecene	1.40659	0.03782	3.0906	3.3133	3.2061	3.2971	3.1572	3.3481	3.2823	2.9659	3.3722	3.4487	3.3687	3.2927	3.4781	3.3065	3.3058	3.3164	3.2382	3.326
Oxysolavetivone	1.11013	0.01219	3.9643	3.9331	3.8649	3.9833	3.8768	3.9869	3.9167	3.9683	3.9289	3.955	4.0211	4.094	4.0494	3.9462	3.9784	4.0433	3.969	3.951
Phenethylamine glucuronide	1.1937	0.008309	4.0229	4.0431	4.0169	3.9713	3.9751	4.0816	4.0012	3.9789	4.0178	4.1564	4.1373	4.1061	4.1315	4.0656	4.0304	4.0861	3.9792	4.035
2-Hydroxyglutarate	1.01558	0.01845	3.4804	3.473	3.4978	3.4843	3.3789	3.4576	3.39	3.4337	3.4453	3.2974	3.3516	3.3993	3.3825	3.4252	3.4377	3.4551	3.388	3.4063
Homoarginine	1.60225	0.02927	3.9464	3.8701	3.9708	4.0465	4.0874	3.8683	3.7668	4.0027	3.6363	4.1039	4.2356	3.9202	4.1998	4.0536	3.8933	4.1724	3.887	4.147
1,4-Ipomeadiol	1.27468	0.0004695	4.5134	4.5468	4.5166	4.4566	4.4531	4.5175	4.4824	4.4666	4.4838	4.5821	4.5706	4.5755	4.6077	4.5482	4.5517	4.5647	4.5052	4.5209
Deoxythymidine diphosphate-l-rhamnose	1.53467	0.006253	3.7078	3.7937	3.7866	3.7419	3.7113	3.7766	3.7304	3.761	3.7926	3.4027	3.6823	3.7171	3.6138	3.5646	3.6624	3.7422	3.7103	3.67
3-Methylcyclopentene	1.34815	0.0187	2.6385	2.5823	2.5388	2.5858	2.6654	2.6967	2.6329	2.753	2.5435	2.3782	2.5594	2.5014	2.6073	2.3986	2.5949	2.5215	2.5236	2.6464
4,8,12-trimethyl-tridecanoic acid	1.38872	0.02735	3.6559	3.5968	3.583	3.6212	3.5644	3.6902	3.6966	3.3583	3.518	3.548	3.7272	3.605	3.7436	3.8041	3.7778	3.7413	3.7864	3.5834
6,10,14-Trimethyl-5,9,13-pentadecatrien-2-one	1.08487	0.03701	3.6562	3.7404	3.8051	3.6203	3.7519	3.8047	3.7332	3.8144	3.8986	3.9018	3.8122	3.7664	3.8452	3.8584	3.7782	3.8252	3.8223	3.8625
(E)-2,6-Dimethyl-2,5-heptadienoic acid	1.29529	0.006946	3.1795	3.0836	3.0806	3.0177	3.0701	3.1641	3.0369	3.1657	3.0838	3.145	3.2158	3.284	3.2211	3.2053	3.1713	3.1205	3.1393	3.1236
Homocysteinesulfinic acid	1.86217	0.0002866	3.5024	3.5139	3.4768	3.4356	3.3378	3.4481	3.4903	3.4667	3.474	3.6549	3.6274	3.7032	3.652	3.5346	3.6101	3.5807	3.5223	3.4858
Vanillactic acid	1.19753	0.01446	3.0628	3.0355	3.0881	3.1153	3.1588	3.0137	3.1664	3.168	3.0891	3.0635	2.9565	3.0342	3.1017	3.0598	2.9622	2.9185	3.0783	3.0262
Glucoiberverin	1.73237	0.04734	4.2925	4.4211	4.279	4.5126	4.4461	4.2878	4.3938	4.2896	4.3021	3.6043	4.2838	4.5132	4.1234	4.1429	4.412	4.1876	4.1282	4.0936
Indolylacryloylglycine	1.21273	0.01323	3.3547	3.4373	3.3176	3.3531	3.276	3.42	3.2663	3.3465	3.2886	3.2478	3.2127	3.1992	3.3378	3.1921	3.2706	3.3236	3.3402	3.2293
(4S)-7-Hydroxy-4-isopropenyl-7-methyl-2-oxo-oxepanone	1.40763	0.002254	3.3248	3.326	3.3554	3.2116	3.2272	3.3402	3.1364	3.2725	3.2683	3.3623	3.3546	3.3821	3.3701	3.3599	3.3845	3.3933	3.3573	3.3177
Imidazol-5-yl-pyruvate	2.26724	0.005527	3.9793	4.0681	3.9206	4.1702	3.8849	4.097	4.2183	4.3847	4.2894	3.78	3.7408	4.0472	3.8707	3.7921	4.2053	3.7404	3.865	3.6498
(E)-6,10-Dimethyl-9-methylene-5-undecen-2-one	1.49879	0.0003589	3.6048	3.6967	3.6278	3.6937	3.5931	3.7031	3.6597	3.6245	3.7179	3.5549	3.5885	3.5383	3.6538	3.5023	3.5869	3.5472	3.54	3.5518
2,4-Hexadienyl acetate	1.984	0.005329	3.3514	3.2453	3.4501	3.3926	3.2567	3.262	3.2175	3.162	3.0357	3.6043	3.5838	3.5447	3.4701	3.4572	3.344	3.4825	3.2073	3.3879
Glutamylproline	1.58511	3.495e-07	4.0065	4.0008	3.9854	3.9906	4.0133	3.9968	4.0106	4.0421	4.0086	3.8923	3.8728	3.9285	3.926	3.9294	3.9327	3.958	3.942	3.9133
Enrofloxacin	2.3326	0.002739	3.7603	3.9289	4.0293	3.9704	4.1326	3.9736	3.9918	3.7222	3.4692	4.1682	4.2659	4.1147	4.2139	4.095	4.0519	4.1306	4.0898	4.1052
N-Methylaspidospermatidine	1.76748	0.002561	3.8356	3.6879	3.5431	3.647	3.7774	3.6019	3.6957	3.6604	3.6877	3.5719	3.6106	3.6036	3.4242	3.6027	3.6406	3.4242	3.4528	3.4864
Fortimicin FU-10	3.28407	0.000626	3.6373	4.0075	3.5945	3.8886	3.91	3.8059	3.9504	3.9687	4.4056	3.8198	3.4661	3.4063	3.0462	3.3781	3.5125	3.257	3.3921	3.7105
Norophthalmic acid	2.10355	0.003641	5.1025	5.1412	5.2286	4.9284	4.7853	4.8703	4.8633	5.0207	4.9626	4.9772	4.7382	4.6947	4.7529	4.7961	4.7943	4.9336	4.704	4.6049
Argininosuccinic acid	2.6771	0.0003138	4.5131	4.2018	4.2154	4.244	4.2607	3.9718	4.03	4.2858	4.2128	4.612	4.6282	4.3861	4.4987	4.5683	4.3071	4.4904	4.4513	4.6769
Valtratum	2.89277	0.006338	3.978	3.8241	4.1266	4.0343	4.2838	3.9219	4.0571	4.2947	3.1684	4.4307	4.5584	4.027	4.3767	4.3078	4.0696	4.4673	4.5568	4.7485
Silybin	2.95706	0.02801	3.7703	4.6301	4.7463	4.2436	3.6717	4.5166	4.5851	4.901	5.1458	3.3011	3.2406	4.2844	4.4198	4.0902	4.1299	3.8135	4.0373	4.2103
2-Heptanethiol	1.34667	0.03126	5.2292	5.2711	5.3183	5.4401	5.3333	5.2609	5.2962	5.2336	5.148	5.4978	5.5562	5.4437	5.4335	5.3648	5.3295	5.3228	5.2233	5.3003
9-Decenoic acid	1.25978	0.03438	3.9032	3.9528	3.8126	3.9196	3.8055	3.9267	3.8383	3.8812	3.912	3.767	3.5446	3.8873	3.9079	3.8014	3.8604	3.6838	3.794	3.8381
Gibberellin A105	2.56297	0.005166	3.7564	3.6636	3.8394	3.9552	3.9576	3.8191	3.8881	4.1174	3.3389	4.1265	4.3069	3.8764	4.1837	4.0044	3.8158	4.2171	4.3253	4.4424
Cyclohexylethyl acetate	1.15002	0.009344	4.1062	4.1558	4.0661	4.0684	4.0832	4.1277	4.1551	4.1508	4.1504	3.9082	4.0309	4.0866	4.1017	4.0643	4.0864	4.0793	4.0549	4.0358
Protoporphyrin	1.07419	0.04959	4.5875	4.5136	4.6772	4.598	4.6226	4.5183	4.483	4.6117	4.4531	4.6783	4.6002	4.4944	4.5998	4.7266	4.5984	4.6304	4.8022	4.6674
